# Supplementary material
Source: Springer Nature journal article supplement (https://www.springermedizin.de/resource/supplementary/12882_2014_834_MOESM1_ESM.docx/9454414)
Supplement: MOESM1 [file 9454414]

Table 2.Clinical characteristics of subjects

| Variables | whole group  n=235 | HAART  subjects  n=179 | Naive  subjects  n=56 | p |
| --- | --- | --- | --- | --- |
| Known HIV infection duration (years) | 4,7 ± 3,2 | 5,3 ± 3,04 | 2,8 ± 2,9 | <0,0001 |
| Duration of HAART (months) | NA | 46,2 ± 30,08 | NA |  |
| WHO stage :   - Stage 1 - Stage 2 - Stage 3 - Stage 4 | 25 (10,6)  53 (22,6)  140 (59,6)  17 (7,2) | 12 (5,1)  21 (8,9)  129 (54,9)  17 (7,2) | 13 (5,5)  32 (13,6)  11 (4,7)  0 | 0,39  0,93  0,0039 <0,0001 |
| Body mass index (kg/m²) | 22,3 ± 3,8 | 22,5 ± 3,9 | 21,7 ± 3,4 | 0,198 |
| SBP (mmHg) | 118,82 ± 20,89 | 120,58 ± 21,7 | 113,2 ± 16,7 | 0,023 |
| DBP (mmHg) | 77,7 ± 14,02 | 79,8 ± 14,7 | 71,8 ± 11,6 | 0,0002 |
|  |  |  |  |  |
| HAART regimen : |  |  |  |  |
| AZT+3TC+ NVP | NA | 164 (94,8) | NA |  |
| d4T + 3TC + NVP | NA | 3 (1,6) | NA |  |
| ABC + DDI + Lp/r | NA | 9 (5) | NA |  |
| TDF + 3TC + EFV | NA | 3 (1,6) | NA |  |

HTA =hypertension; BMC= body mass index; SBP = Systolic blood pressure ; DBP= diastolic blood pressure ; CKD = chronic kidney disease; HAART: Highly active antiretroviral therapy. NA : not applicable ; d4T:stavudine, 3TC :lamivudine, NVP : nevirapine, ABC : abacavir, DDI : didanosine, Lp/r : lopinavir/ritonavir, EFV :efavirenz, TDF: tenofovir
